# Supplementary material for: Measuring the Effect of Ecological Factors (Food Waste Volume Changing) on the Weight of Cats in Tehran / 2016-2020
Source: Preprints.org preprint supplement (doi:10.20944/preprints202206.0430.v2), 2022-07-04
Supplement: Supplementary file 1 [file supplementary]

## Sheet: SupplementaryMaterial
Year	Season	Disteract	Age	Gender	Weight
2016	Spring	1	18>	N	0
2016	Spring	1	18>	N	0
2016	Spring	1	18>	N	0
2016	Spring	1	18>	N	0
2016	Spring	1	18>	N	0
2016	Spring	1	18>	N	0
2016	Spring	1	18-24	F	3168
2016	Spring	1	18-24	F	3211
2016	Spring	1	24-30	F	3426
2016	Spring	1	24-30	M	3662
2016	Spring	1	42<	M	4104
2016	Spring	2	18>	N	0
2016	Spring	2	18>	N	0
2016	Spring	2	18>	N	0
2016	Spring	2	18>	N	0
2016	Spring	2	18>	N	0
2016	Spring	2	18>	N	0
2016	Spring	2	18>	N	0
2016	Spring	2	18-24	F	3074
2016	Spring	2	18-24	F	3006
2016	Spring	2	18-24	M	2993
2016	Spring	2	24-30	F	3162
2016	Spring	2	24-30	F	3128
2016	Spring	2	30-36	M	3469
2016	Spring	2	36-42	F	3782
2016	Spring	3	18>	N	0
2016	Spring	3	18>	N	0
2016	Spring	3	18>	N	0
2016	Spring	3	18>	N	0
2016	Spring	3	18>	N	0
2016	Spring	3	18>	N	0
2016	Spring	3	18>	N	0
2016	Spring	3	18>	N	0
2016	Spring	3	18-24	F	3019
2016	Spring	3	18-24	M	3127
2016	Spring	3	24-30	F	3252
2016	Spring	3	24-30	F	3290
2016	Spring	3	42<	M	3971
2016	Spring	4	18>	N	0
2016	Spring	4	18>	N	0
2016	Spring	4	18>	N	0
2016	Spring	4	18>	N	0
2016	Spring	4	18>	N	0
2016	Spring	4	18>	N	0
2016	Spring	4	18>	N	0
2016	Spring	4	18>	N	0
2016	Spring	4	18>	N	0
2016	Spring	4	18-24	F	3149
2016	Spring	4	18-24	F	3174
2016	Spring	4	24-30	F	3227
2016	Spring	4	24-30	M	3278
2016	Spring	4	30-36	F	3581
2016	Spring	4	36-42	F	3795
2016	Spring	4	36-42	M	3888
2016	Spring	5	18>	N	0
2016	Spring	5	18>	N	0
2016	Spring	5	18>	N	0
2016	Spring	5	18>	N	0
2016	Spring	5	18>	N	0
2016	Spring	5	18>	N	0
2016	Spring	5	18>	N	0
2016	Spring	5	18>	N	0
2016	Spring	5	18>	N	0
2016	Spring	5	18>	N	0
2016	Spring	5	18>	N	0
2016	Spring	5	18-24	F	3103
2016	Spring	5	18-24	F	3085
2016	Spring	5	18-24	M	3026
2016	Spring	5	24-30	F	3367
2016	Spring	5	30-36	M	3834
2016	Spring	5	36-42	F	3752
2016	Spring	7	18>	N	0
2016	Spring	7	18>	N	0
2016	Spring	7	18>	N	0
2016	Spring	7	18>	N	0
2016	Spring	7	18>	N	0
2016	Spring	7	18>	N	0
2016	Spring	7	18>	N	0
2016	Spring	7	18>	N	0
2016	Spring	7	18>	N	0
2016	Spring	7	18>	N	0
2016	Spring	7	18>	N	0
2016	Spring	7	18>	N	0
2016	Spring	7	18>	N	0
2016	Spring	7	18>	N	0
2016	Spring	7	18>	N	0
2016	Spring	7	18-24	F	3259
2016	Spring	7	18-24	F	3187
2016	Spring	7	18-24	F	3201
2016	Spring	7	18-24	F	3172
2016	Spring	7	24-30	F	3319
2016	Spring	7	24-30	F	3416
2016	Spring	7	24-30	F	3381
2016	Spring	7	24-30	F	3360
2016	Spring	7	24-30	M	3402
2016	Spring	7	30-36	F	3547
2016	Spring	7	30-36	F	3599
2016	Spring	7	36-42	M	3824
2016	Spring	7	42<	F	4234
2016	Spring	7	42<	M	4169
2016	Spring	8	18>	N	0
2016	Spring	8	18>	N	0
2016	Spring	8	18>	N	0
2016	Spring	8	18>	N	0
2016	Spring	8	18>	N	0
2016	Spring	8	18>	N	0
2016	Spring	8	18>	N	0
2016	Spring	8	18>	N	0
2016	Spring	8	18>	N	0
2016	Spring	8	18>	N	0
2016	Spring	8	18>	N	0
2016	Spring	8	18>	N	0
2016	Spring	8	18>	N	0
2016	Spring	8	18>	N	0
2016	Spring	8	18>	N	0
2016	Spring	8	18>	N	0
2016	Spring	8	18>	N	0
2016	Spring	8	18>	N	0
2016	Spring	8	18-24	F	3314
2016	Spring	8	18-24	F	3272
2016	Spring	8	18-24	F	3326
2016	Spring	8	24-30	F	3455
2016	Spring	8	24-30	F	3414
2016	Spring	8	24-30	M	3501
2016	Spring	8	30-36	F	3654
2016	Spring	8	30-36	F	3723
2016	Spring	8	36-42	F	3795
2016	Spring	8	36-42	M	3922
2016	Spring	8	42<	F	4098
2016	Spring	10	18>	N	0
2016	Spring	10	18>	N	0
2016	Spring	10	18>	N	0
2016	Spring	10	18>	N	0
2016	Spring	10	18>	N	0
2016	Spring	10	18>	N	0
2016	Spring	10	18>	N	0
2016	Spring	10	18>	N	0
2016	Spring	10	18>	N	0
2016	Spring	10	18>	N	0
2016	Spring	10	18>	N	0
2016	Spring	10	18>	N	0
2016	Spring	10	18>	N	0
2016	Spring	10	18>	N	0
2016	Spring	10	18>	N	0
2016	Spring	10	18>	N	0
2016	Spring	10	18>	N	0
2016	Spring	10	18>	N	0
2016	Spring	10	18>	N	0
2016	Spring	10	18>	N	0
2016	Spring	10	18>	N	0
2016	Spring	10	18>	N	0
2016	Spring	10	18>	N	0
2016	Spring	10	18>	N	0
2016	Spring	10	18>	N	0
2016	Spring	10	18>	N	0
2016	Spring	10	18-24	F	2878
2016	Spring	10	18-24	F	2918
2016	Spring	10	18-24	F	2839
2016	Spring	10	18-24	M	2942
2016	Spring	10	24-30	F	2993
2016	Spring	10	24-30	F	3017
2016	Spring	10	24-30	F	3041
2016	Spring	10	24-30	F	2965
2016	Spring	10	24-30	F	3000
2016	Spring	10	24-30	F	2928
2016	Spring	10	30-36	F	3185
2016	Spring	10	30-36	F	3097
2016	Spring	10	30-36	M	3236
2016	Spring	10	36-42	F	3347
2016	Spring	10	42<	F	3342
2016	Spring	10	42<	M	3534
2016	Spring	12	18>	N	0
2016	Spring	12	18>	N	0
2016	Spring	12	18>	N	0
2016	Spring	12	18>	N	0
2016	Spring	12	18>	N	0
2016	Spring	12	18>	N	0
2016	Spring	12	18>	N	0
2016	Spring	12	18>	N	0
2016	Spring	12	18>	N	0
2016	Spring	12	18>	N	0
2016	Spring	12	18>	N	0
2016	Spring	12	18>	N	0
2016	Spring	12	18-24	F	2814
2016	Spring	12	18-24	M	2896
2016	Spring	12	24-30	F	2925
2016	Spring	12	24-30	F	2873
2016	Spring	12	24-30	F	2910
2016	Spring	12	30-36	F	3005
2016	Spring	12	30-36	M	3085
2016	Spring	12	36-42	F	3321
2016	Spring	12	42<	F	3657
2016	Spring	14	18>	N	0
2016	Spring	14	18>	N	0
2016	Spring	14	18>	N	0
2016	Spring	14	18>	N	0
2016	Spring	14	18>	N	0
2016	Spring	14	18>	N	0
2016	Spring	14	18>	N	0
2016	Spring	14	18>	N	0
2016	Spring	14	18>	N	0
2016	Spring	14	18>	N	0
2016	Spring	14	18>	N	0
2016	Spring	14	18>	N	0
2016	Spring	14	18>	N	0
2016	Spring	14	18>	N	0
2016	Spring	14	18>	N	0
2016	Spring	14	18>	N	0
2016	Spring	14	18-24	F	2985
2016	Spring	14	18-24	F	2903
2016	Spring	14	18-24	F	2931
2016	Spring	14	18-24	F	3000
2016	Spring	14	18-24	M	3026
2016	Spring	14	24-30	F	3120
2016	Spring	14	24-30	F	3183
2016	Spring	14	30-36	F	3399
2016	Spring	14	30-36	F	3321
2016	Spring	14	36-42	M	3470
2016	Spring	14	42<	F	3813
2016	Spring	15	18>	N	0
2016	Spring	15	18>	N	0
2016	Spring	15	18>	N	0
2016	Spring	15	18>	N	0
2016	Spring	15	18>	N	0
2016	Spring	15	18>	N	0
2016	Spring	15	18>	N	0
2016	Spring	15	18>	N	0
2016	Spring	15	18>	N	0
2016	Spring	15	18>	N	0
2016	Spring	15	18>	N	0
2016	Spring	15	18>	N	0
2016	Spring	15	18>	N	0
2016	Spring	15	18-24	F	3121
2016	Spring	15	18-24	F	3084
2016	Spring	15	18-24	F	3079
2016	Spring	15	24-30	F	3180
2016	Spring	15	24-30	M	3197
2016	Spring	15	30-36	M	3346
2016	Spring	15	36-42	F	3511
2016	Spring	19	18>	N	0
2016	Spring	19	18>	N	0
2016	Spring	19	18>	N	0
2016	Spring	19	18>	N	0
2016	Spring	19	18>	N	0
2016	Spring	19	18>	N	0
2016	Spring	19	18-24	F	3050
2016	Spring	19	18-24	F	3092
2016	Spring	19	24-30	F	3168
2016	Spring	19	24-30	F	3254
2016	Spring	19	30-36	F	3461
2016	Spring	19	30-36	M	3613
2016	Spring	20	18>	N	0
2016	Spring	20	18>	N	0
2016	Spring	20	18>	N	0
2016	Spring	20	18>	N	0
2016	Spring	20	18>	N	0
2016	Spring	20	18>	N	0
2016	Spring	20	18>	N	0
2016	Spring	20	18>	N	0
2016	Spring	20	18>	N	0
2016	Spring	20	18>	N	0
2016	Spring	20	18>	N	0
2016	Spring	20	18>	N	0
2016	Spring	20	18-24	F	3179
2016	Spring	20	18-24	M	3202
2016	Spring	20	18-24	M	3311
2016	Spring	20	24-30	F	3215
2016	Spring	20	30-36	F	3677
2016	Spring	20	36-42	F	3610
2016	Spring	20	42<	F	3704
2016	Spring	20	42<	M	3648
2016	Summer	1	18>	N	0
2016	Summer	1	18>	N	0
2016	Summer	1	18>	N	0
2016	Summer	1	18>	N	0
2016	Summer	1	18>	N	0
2016	Summer	1	18>	N	0
2016	Summer	1	18>	N	0
2016	Summer	1	18-24	F	3200
2016	Summer	1	24-30	F	3293
2016	Summer	1	24-30	F	3447
2016	Summer	1	30-36	M	3711
2016	Summer	1	42<	M	4095
2016	Summer	2	18>	N	0
2016	Summer	2	18>	N	0
2016	Summer	2	18>	N	0
2016	Summer	2	18>	N	0
2016	Summer	2	18>	N	0
2016	Summer	2	18>	N	0
2016	Summer	2	18>	N	0
2016	Summer	2	18-24	F	3045
2016	Summer	2	18-24	F	3010
2016	Summer	2	24-30	F	3254
2016	Summer	2	24-30	M	3065
2016	Summer	2	30-36	F	3285
2016	Summer	2	36-42	M	3531
2016	Summer	2	42<	F	3841
2016	Summer	3	18>	N	0
2016	Summer	3	18>	N	0
2016	Summer	3	18>	N	0
2016	Summer	3	18>	N	0
2016	Summer	3	18>	N	0
2016	Summer	3	18>	N	0
2016	Summer	3	18>	N	0
2016	Summer	3	18>	N	0
2016	Summer	3	18>	N	0
2016	Summer	3	18-24	F	3040
2016	Summer	3	18-24	F	3075
2016	Summer	3	24-30	M	3189
2016	Summer	3	30-36	F	3498
2016	Summer	3	42<	M	3962
2016	Summer	4	18>	N	0
2016	Summer	4	18>	N	0
2016	Summer	4	18>	N	0
2016	Summer	4	18>	N	0
2016	Summer	4	18>	N	0
2016	Summer	4	18>	N	0
2016	Summer	4	18>	N	0
2016	Summer	4	18>	N	0
2016	Summer	4	18>	N	0
2016	Summer	4	18>	N	0
2016	Summer	4	18-24	M	3197
2016	Summer	4	24-30	F	3194
2016	Summer	4	24-30	F	3270
2016	Summer	4	24-30	F	3269
2016	Summer	4	24-30	F	3288
2016	Summer	4	30-36	M	3587
2016	Summer	4	42<	F	3856
2016	Summer	5	18>	N	0
2016	Summer	5	18>	N	0
2016	Summer	5	18>	N	0
2016	Summer	5	18>	N	0
2016	Summer	5	18>	N	0
2016	Summer	5	18>	N	0
2016	Summer	5	18>	N	0
2016	Summer	5	18>	N	0
2016	Summer	5	18>	N	0
2016	Summer	5	18>	N	0
2016	Summer	5	18-24	F	3064
2016	Summer	5	18-24	M	3085
2016	Summer	5	24-30	F	3308
2016	Summer	5	24-30	F	3179
2016	Summer	5	36-42	M	3890
2016	Summer	5	42<	F	3819
2016	Summer	7	18>	N	0
2016	Summer	7	18>	N	0
2016	Summer	7	18>	N	0
2016	Summer	7	18>	N	0
2016	Summer	7	18>	N	0
2016	Summer	7	18>	N	0
2016	Summer	7	18>	N	0
2016	Summer	7	18>	N	0
2016	Summer	7	18>	N	0
2016	Summer	7	18>	N	0
2016	Summer	7	18>	N	0
2016	Summer	7	18>	N	0
2016	Summer	7	18>	N	0
2016	Summer	7	18>	N	0
2016	Summer	7	18>	N	0
2016	Summer	7	18>	N	0
2016	Summer	7	18>	N	0
2016	Summer	7	18-24	F	3250
2016	Summer	7	18-24	F	3164
2016	Summer	7	18-24	F	3222
2016	Summer	7	24-30	F	3373
2016	Summer	7	24-30	F	3409
2016	Summer	7	24-30	F	3289
2016	Summer	7	24-30	F	3354
2016	Summer	7	24-30	M	3454
2016	Summer	7	30-36	F	3728
2016	Summer	7	36-42	F	3645
2016	Summer	7	36-42	M	3849
2016	Summer	7	42<	F	4257
2016	Summer	8	18>	N	0
2016	Summer	8	18>	N	0
2016	Summer	8	18>	N	0
2016	Summer	8	18>	N	0
2016	Summer	8	18>	N	0
2016	Summer	8	18>	N	0
2016	Summer	8	18>	N	0
2016	Summer	8	18>	N	0
2016	Summer	8	18>	N	0
2016	Summer	8	18>	N	0
2016	Summer	8	18>	N	0
2016	Summer	8	18>	N	0
2016	Summer	8	18>	N	0
2016	Summer	8	18>	N	0
2016	Summer	8	18>	N	0
2016	Summer	8	18>	N	0
2016	Summer	8	18>	N	0
2016	Summer	8	18-24	F	3249
2016	Summer	8	18-24	F	3221
2016	Summer	8	24-30	F	3482
2016	Summer	8	24-30	F	3379
2016	Summer	8	24-30	F	3427
2016	Summer	8	24-30	M	3538
2016	Summer	8	30-36	F	3771
2016	Summer	8	36-42	F	3866
2016	Summer	8	42<	F	3830
2016	Summer	8	42<	M	3978
2016	Summer	10	18>	N	0
2016	Summer	10	18>	N	0
2016	Summer	10	18>	N	0
2016	Summer	10	18>	N	0
2016	Summer	10	18>	N	0
2016	Summer	10	18>	N	0
2016	Summer	10	18>	N	0
2016	Summer	10	18>	N	0
2016	Summer	10	18>	N	0
2016	Summer	10	18>	N	0
2016	Summer	10	18>	N	0
2016	Summer	10	18>	N	0
2016	Summer	10	18>	N	0
2016	Summer	10	18>	N	0
2016	Summer	10	18>	N	0
2016	Summer	10	18>	N	0
2016	Summer	10	18>	N	0
2016	Summer	10	18>	N	0
2016	Summer	10	18>	N	0
2016	Summer	10	18>	N	0
2016	Summer	10	18>	N	0
2016	Summer	10	18>	N	0
2016	Summer	10	18>	N	0
2016	Summer	10	18>	N	0
2016	Summer	10	18>	N	0
2016	Summer	10	18>	N	0
2016	Summer	10	18-24	F	2874
2016	Summer	10	18-24	F	2907
2016	Summer	10	18-24	F	2945
2016	Summer	10	18-24	F	2843
2016	Summer	10	18-24	F	2955
2016	Summer	10	18-24	M	3001
2016	Summer	10	24-30	F	3104
2016	Summer	10	24-30	F	3007
2016	Summer	10	24-30	F	2985
2016	Summer	10	24-30	M	3092
2016	Summer	10	30-36	F	3084
2016	Summer	10	30-36	F	3152
2016	Summer	10	30-36	M	3274
2016	Summer	10	36-42	F	3369
2016	Summer	10	36-42	F	3290
2016	Summer	10	42<	F	3371
2016	Summer	10	42<	M	3567
2016	Summer	12	18>	N	0
2016	Summer	12	18>	N	0
2016	Summer	12	18>	N	0
2016	Summer	12	18>	N	0
2016	Summer	12	18>	N	0
2016	Summer	12	18>	N	0
2016	Summer	12	18>	N	0
2016	Summer	12	18>	N	0
2016	Summer	12	18>	N	0
2016	Summer	12	18>	N	0
2016	Summer	12	18>	N	0
2016	Summer	12	18>	N	0
2016	Summer	12	18-24	F	2758
2016	Summer	12	18-24	F	2877
2016	Summer	12	18-24	F	2897
2016	Summer	12	24-30	F	2967
2016	Summer	12	24-30	F	2904
2016	Summer	12	24-30	M	3011
2016	Summer	12	30-36	M	3127
2016	Summer	12	36-42	F	3350
2016	Summer	12	36-42	F	3462
2016	Summer	12	42<	F	3690
2016	Summer	14	18>	N	0
2016	Summer	14	18>	N	0
2016	Summer	14	18>	N	0
2016	Summer	14	18>	N	0
2016	Summer	14	18>	N	0
2016	Summer	14	18>	N	0
2016	Summer	14	18>	N	0
2016	Summer	14	18>	N	0
2016	Summer	14	18>	N	0
2016	Summer	14	18>	N	0
2016	Summer	14	18>	N	0
2016	Summer	14	18>	N	0
2016	Summer	14	18>	N	0
2016	Summer	14	18>	N	0
2016	Summer	14	18>	N	0
2016	Summer	14	18>	N	0
2016	Summer	14	18-24	F	2964
2016	Summer	14	18-24	F	3015
2016	Summer	14	18-24	F	2991
2016	Summer	14	18-24	M	3049
2016	Summer	14	24-30	F	3096
2016	Summer	14	24-30	F	3164
2016	Summer	14	30-36	F	3424
2016	Summer	14	30-36	F	3333
2016	Summer	14	36-42	F	3516
2016	Summer	14	36-42	M	3553
2016	Summer	14	42<	F	3872
2016	Summer	15	18>	N	0
2016	Summer	15	18>	N	0
2016	Summer	15	18>	N	0
2016	Summer	15	18>	N	0
2016	Summer	15	18>	N	0
2016	Summer	15	18>	N	0
2016	Summer	15	18>	N	0
2016	Summer	15	18>	N	0
2016	Summer	15	18>	N	0
2016	Summer	15	18>	N	0
2016	Summer	15	18>	N	0
2016	Summer	15	18>	N	0
2016	Summer	15	18>	N	0
2016	Summer	15	18-24	F	3149
2016	Summer	15	18-24	F	3092
2016	Summer	15	24-30	F	3155
2016	Summer	15	24-30	F	3116
2016	Summer	15	24-30	M	3230
2016	Summer	15	30-36	F	3300
2016	Summer	15	30-36	M	3428
2016	Summer	15	36-42	F	3575
2016	Summer	19	18>	N	0
2016	Summer	19	18>	N	0
2016	Summer	19	18>	N	0
2016	Summer	19	18>	N	0
2016	Summer	19	18>	N	0
2016	Summer	19	18>	N	0
2016	Summer	19	18>	N	0
2016	Summer	19	18-24	F	3088
2016	Summer	19	18-24	M	3186
2016	Summer	19	24-30	F	3177
2016	Summer	19	24-30	F	3296
2016	Summer	19	30-36	F	3497
2016	Summer	19	36-42	M	3649
2016	Summer	20	18>	N	0
2016	Summer	20	18>	N	0
2016	Summer	20	18>	N	0
2016	Summer	20	18>	N	0
2016	Summer	20	18>	N	0
2016	Summer	20	18>	N	0
2016	Summer	20	18>	N	0
2016	Summer	20	18>	N	0
2016	Summer	20	18>	N	0
2016	Summer	20	18>	N	0
2016	Summer	20	18>	N	0
2016	Summer	20	18>	N	0
2016	Summer	20	18-24	F	3145
2016	Summer	20	18-24	F	3181
2016	Summer	20	18-24	F	3127
2016	Summer	20	18-24	M	3330
2016	Summer	20	24-30	F	3288
2016	Summer	20	24-30	M	3437
2016	Summer	20	30-36	F	3739
2016	Summer	20	36-42	F	3634
2016	Fall	1	18>	N	0
2016	Fall	1	18>	N	0
2016	Fall	1	18>	N	0
2016	Fall	1	18>	N	0
2016	Fall	1	18>	N	0
2016	Fall	1	18>	N	0
2016	Fall	1	18>	N	0
2016	Fall	1	18>	N	0
2016	Fall	1	18-24	F	3228
2016	Fall	1	18-24	F	3243
2016	Fall	1	24-30	F	3341
2016	Fall	1	30-36	M	3779
2016	Fall	1	42<	M	4076
2016	Fall	2	18>	N	0
2016	Fall	2	18>	N	0
2016	Fall	2	18>	N	0
2016	Fall	2	18>	N	0
2016	Fall	2	18>	N	0
2016	Fall	2	18>	N	0
2016	Fall	2	18>	N	0
2016	Fall	2	18-24	F	3062
2016	Fall	2	24-30	F	3109
2016	Fall	2	24-30	M	3124
2016	Fall	2	30-36	F	3342
2016	Fall	2	36-42	F	3616
2016	Fall	2	42<	F	3908
2016	Fall	3	18>	N	0
2016	Fall	3	18>	N	0
2016	Fall	3	18>	N	0
2016	Fall	3	18>	N	0
2016	Fall	3	18>	N	0
2016	Fall	3	18>	N	0
2016	Fall	3	18>	N	0
2016	Fall	3	18>	N	0
2016	Fall	3	18>	N	0
2016	Fall	3	18-24	F	3081
2016	Fall	3	24-30	F	3237
2016	Fall	3	24-30	F	3324
2016	Fall	3	24-30	M	3236
2016	Fall	3	42<	M	4095
2016	Fall	4	18>	N	0
2016	Fall	4	18>	N	0
2016	Fall	4	18>	N	0
2016	Fall	4	18>	N	0
2016	Fall	4	18>	N	0
2016	Fall	4	18>	N	0
2016	Fall	4	18>	N	0
2016	Fall	4	18>	N	0
2016	Fall	4	18>	N	0
2016	Fall	4	18-24	F	3168
2016	Fall	4	18-24	M	3245
2016	Fall	4	24-30	F	3274
2016	Fall	4	24-30	F	3315
2016	Fall	4	24-30	F	3300
2016	Fall	4	30-36	F	3577
2016	Fall	4	30-36	M	3635
2016	Fall	4	42<	F	3903
2016	Fall	5	18>	N	0
2016	Fall	5	18>	N	0
2016	Fall	5	18>	N	0
2016	Fall	5	18>	N	0
2016	Fall	5	18>	N	0
2016	Fall	5	18>	N	0
2016	Fall	5	18>	N	0
2016	Fall	5	18>	N	0
2016	Fall	5	18>	N	0
2016	Fall	5	18>	N	0
2016	Fall	5	18-24	F	2982
2016	Fall	5	18-24	F	3017
2016	Fall	5	24-30	F	3059
2016	Fall	5	24-30	M	3129
2016	Fall	5	30-36	F	3540
2016	Fall	5	36-42	M	3935
2016	Fall	5	42<	F	3888
2016	Fall	7	18>	N	0
2016	Fall	7	18>	N	0
2016	Fall	7	18>	N	0
2016	Fall	7	18>	N	0
2016	Fall	7	18>	N	0
2016	Fall	7	18>	N	0
2016	Fall	7	18>	N	0
2016	Fall	7	18>	N	0
2016	Fall	7	18>	N	0
2016	Fall	7	18>	N	0
2016	Fall	7	18>	N	0
2016	Fall	7	18>	N	0
2016	Fall	7	18>	N	0
2016	Fall	7	18>	N	0
2016	Fall	7	18>	N	0
2016	Fall	7	18>	N	0
2016	Fall	7	18-24	F	3186
2016	Fall	7	18-24	M	3205
2016	Fall	7	24-30	F	3391
2016	Fall	7	24-30	F	3400
2016	Fall	7	24-30	F	3318
2016	Fall	7	24-30	F	3366
2016	Fall	7	30-36	F	3503
2016	Fall	7	30-36	M	3455
2016	Fall	7	36-42	F	3764
2016	Fall	7	36-42	F	3683
2016	Fall	7	42<	F	4117
2016	Fall	7	42<	M	3871
2016	Fall	8	18>	N	0
2016	Fall	8	18>	N	0
2016	Fall	8	18>	N	0
2016	Fall	8	18>	N	0
2016	Fall	8	18>	N	0
2016	Fall	8	18>	N	0
2016	Fall	8	18>	N	0
2016	Fall	8	18>	N	0
2016	Fall	8	18>	N	0
2016	Fall	8	18>	N	0
2016	Fall	8	18>	N	0
2016	Fall	8	18>	N	0
2016	Fall	8	18>	N	0
2016	Fall	8	18>	N	0
2016	Fall	8	18>	N	0
2016	Fall	8	18>	N	0
2016	Fall	8	18>	N	0
2016	Fall	8	18>	N	0
2016	Fall	8	18>	N	0
2016	Fall	8	18-24	F	3386
2016	Fall	8	18-24	F	3249
2016	Fall	8	18-24	F	3215
2016	Fall	8	18-24	M	3365
2016	Fall	8	24-30	F	3425
2016	Fall	8	24-30	F	3490
2016	Fall	8	30-36	F	3644
2016	Fall	8	30-36	M	3592
2016	Fall	8	36-42	F	3759
2016	Fall	8	36-42	F	3815
2016	Fall	8	42<	M	4035
2016	Fall	10	18>	N	0
2016	Fall	10	18>	N	0
2016	Fall	10	18>	N	0
2016	Fall	10	18>	N	0
2016	Fall	10	18>	N	0
2016	Fall	10	18>	N	0
2016	Fall	10	18>	N	0
2016	Fall	10	18>	N	0
2016	Fall	10	18>	N	0
2016	Fall	10	18>	N	0
2016	Fall	10	18>	N	0
2016	Fall	10	18>	N	0
2016	Fall	10	18>	N	0
2016	Fall	10	18>	N	0
2016	Fall	10	18>	N	0
2016	Fall	10	18>	N	0
2016	Fall	10	18>	N	0
2016	Fall	10	18>	N	0
2016	Fall	10	18>	N	0
2016	Fall	10	18>	N	0
2016	Fall	10	18>	N	0
2016	Fall	10	18>	N	0
2016	Fall	10	18>	N	0
2016	Fall	10	18-24	F	2991
2016	Fall	10	18-24	F	2937
2016	Fall	10	18-24	F	3010
2016	Fall	10	18-24	F	2960
2016	Fall	10	18-24	F	2864
2016	Fall	10	24-30	F	2972
2016	Fall	10	24-30	F	3006
2016	Fall	10	24-30	M	3058
2016	Fall	10	30-36	F	3082
2016	Fall	10	30-36	M	3168
2016	Fall	10	36-42	F	3313
2016	Fall	10	36-42	M	3330
2016	Fall	10	42<	F	3423
2016	Fall	10	42<	F	3395
2016	Fall	10	42<	M	3609
2016	Fall	12	18>	N	0
2016	Fall	12	18>	N	0
2016	Fall	12	18>	N	0
2016	Fall	12	18>	N	0
2016	Fall	12	18>	N	0
2016	Fall	12	18>	N	0
2016	Fall	12	18>	N	0
2016	Fall	12	18>	N	0
2016	Fall	12	18>	N	0
2016	Fall	12	18>	N	0
2016	Fall	12	18>	N	0
2016	Fall	12	18>	N	0
2016	Fall	12	18>	N	0
2016	Fall	12	18>	N	0
2016	Fall	12	18-24	F	2802
2016	Fall	12	18-24	F	2855
2016	Fall	12	24-30	F	2939
2016	Fall	12	24-30	F	2921
2016	Fall	12	24-30	F	2983
2016	Fall	12	30-36	F	3184
2016	Fall	12	30-36	M	3279
2016	Fall	12	36-42	M	3509
2016	Fall	12	42<	F	3735
2016	Fall	12	42<	F	3544
2016	Fall	14	18>	N	0
2016	Fall	14	18>	N	0
2016	Fall	14	18>	N	0
2016	Fall	14	18>	N	0
2016	Fall	14	18>	N	0
2016	Fall	14	18>	N	0
2016	Fall	14	18>	N	0
2016	Fall	14	18>	N	0
2016	Fall	14	18>	N	0
2016	Fall	14	18>	N	0
2016	Fall	14	18>	N	0
2016	Fall	14	18>	N	0
2016	Fall	14	18>	N	0
2016	Fall	14	18>	N	0
2016	Fall	14	18>	N	0
2016	Fall	14	18>	N	0
2016	Fall	14	18>	N	0
2016	Fall	14	18-24	F	3104
2016	Fall	14	18-24	F	3055
2016	Fall	14	18-24	F	3168
2016	Fall	14	18-24	F	3023
2016	Fall	14	24-30	F	3149
2016	Fall	14	24-30	M	3102
2016	Fall	14	30-36	F	3401
2016	Fall	14	30-36	F	3251
2016	Fall	14	30-36	F	3318
2016	Fall	14	36-42	F	3576
2016	Fall	14	42<	F	3914
2016	Fall	14	42<	M	3634
2016	Fall	15	18>	N	0
2016	Fall	15	18>	N	0
2016	Fall	15	18>	N	0
2016	Fall	15	18>	N	0
2016	Fall	15	18>	N	0
2016	Fall	15	18>	N	0
2016	Fall	15	18>	N	0
2016	Fall	15	18>	N	0
2016	Fall	15	18>	N	0
2016	Fall	15	18>	N	0
2016	Fall	15	18>	N	0
2016	Fall	15	18>	N	0
2016	Fall	15	18>	N	0
2016	Fall	15	18>	N	0
2016	Fall	15	18-24	F	3238
2016	Fall	15	18-24	F	3144
2016	Fall	15	18-24	F	3111
2016	Fall	15	24-30	F	3249
2016	Fall	15	24-30	F	3177
2016	Fall	15	30-36	M	3317
2016	Fall	15	36-42	M	3539
2016	Fall	15	42<	F	3640
2016	Fall	19	18>	N	0
2016	Fall	19	18>	N	0
2016	Fall	19	18>	N	0
2016	Fall	19	18>	N	0
2016	Fall	19	18>	N	0
2016	Fall	19	18>	N	0
2016	Fall	19	18>	N	0
2016	Fall	19	18-24	F	3105
2016	Fall	19	18-24	F	3059
2016	Fall	19	18-24	M	3247
2016	Fall	19	24-30	F	3321
2016	Fall	19	24-30	F	3213
2016	Fall	19	30-36	F	3319
2016	Fall	19	36-42	F	3525
2016	Fall	19	36-42	M	3684
2016	Fall	20	18>	N	0
2016	Fall	20	18>	N	0
2016	Fall	20	18>	N	0
2016	Fall	20	18>	N	0
2016	Fall	20	18>	N	0
2016	Fall	20	18>	N	0
2016	Fall	20	18>	N	0
2016	Fall	20	18>	N	0
2016	Fall	20	18>	N	0
2016	Fall	20	18>	N	0
2016	Fall	20	18>	N	0
2016	Fall	20	18>	N	0
2016	Fall	20	18-24	F	3174
2016	Fall	20	18-24	F	3190
2016	Fall	20	18-24	F	3216
2016	Fall	20	24-30	F	3245
2016	Fall	20	24-30	M	3463
2016	Fall	20	24-30	M	3572
2016	Fall	20	30-36	F	3326
2016	Fall	20	30-36	F	3699
2016	Fall	20	36-42	F	3791
2017	Winter	1	18>	N	0
2017	Winter	1	18>	N	0
2017	Winter	1	18>	N	0
2017	Winter	1	18>	N	0
2017	Winter	1	18>	N	0
2017	Winter	1	18>	N	0
2017	Winter	1	18-24	F	3257
2017	Winter	1	18-24	F	3279
2017	Winter	1	24-30	F	3404
2017	Winter	1	36-42	M	3783
2017	Winter	2	18>	N	0
2017	Winter	2	18>	N	0
2017	Winter	2	18>	N	0
2017	Winter	2	18>	N	0
2017	Winter	2	18>	N	0
2017	Winter	2	18>	N	0
2017	Winter	2	18>	N	0
2017	Winter	2	18>	N	0
2017	Winter	2	18-24	F	2957
2017	Winter	2	18-24	F	2877
2017	Winter	2	18-24	F	2916
2017	Winter	2	30-36	M	3236
2017	Winter	2	42<	F	3951
2017	Winter	2	42<	F	3668
2017	Winter	3	18>	N	0
2017	Winter	3	18>	N	0
2017	Winter	3	18>	N	0
2017	Winter	3	18>	N	0
2017	Winter	3	18>	N	0
2017	Winter	3	18>	N	0
2017	Winter	3	18>	N	0
2017	Winter	3	18>	N	0
2017	Winter	3	18-24	F	3035
2017	Winter	3	18-24	F	3107
2017	Winter	3	24-30	F	3231
2017	Winter	3	24-30	F	3286
2017	Winter	3	30-36	F	3360
2017	Winter	3	30-36	M	3292
2017	Winter	4	18>	N	0
2017	Winter	4	18>	N	0
2017	Winter	4	18>	N	0
2017	Winter	4	18>	N	0
2017	Winter	4	18>	N	0
2017	Winter	4	18>	N	0
2017	Winter	4	18>	N	0
2017	Winter	4	18>	N	0
2017	Winter	4	18-24	F	3221
2017	Winter	4	18-24	F	3189
2017	Winter	4	18-24	F	3208
2017	Winter	4	24-30	F	3360
2017	Winter	4	24-30	M	3302
2017	Winter	4	30-36	F	3626
2017	Winter	4	36-42	M	3711
2017	Winter	4	42<	F	3947
2017	Winter	5	18>	N	0
2017	Winter	5	18>	N	0
2017	Winter	5	18>	N	0
2017	Winter	5	18>	N	0
2017	Winter	5	18>	N	0
2017	Winter	5	18>	N	0
2017	Winter	5	18>	N	0
2017	Winter	5	18>	N	0
2017	Winter	5	18>	N	0
2017	Winter	5	18>	N	0
2017	Winter	5	18-24	F	3030
2017	Winter	5	18-24	F	2991
2017	Winter	5	18-24	M	3077
2017	Winter	5	24-30	F	3111
2017	Winter	5	30-36	M	3431
2017	Winter	5	36-42	F	3599
2017	Winter	5	42<	M	4013
2017	Winter	7	18>	N	0
2017	Winter	7	18>	N	0
2017	Winter	7	18>	N	0
2017	Winter	7	18>	N	0
2017	Winter	7	18>	N	0
2017	Winter	7	18>	N	0
2017	Winter	7	18>	N	0
2017	Winter	7	18>	N	0
2017	Winter	7	18>	N	0
2017	Winter	7	18>	N	0
2017	Winter	7	18>	N	0
2017	Winter	7	18>	N	0
2017	Winter	7	18>	N	0
2017	Winter	7	18>	N	0
2017	Winter	7	18>	N	0
2017	Winter	7	18-24	F	3148
2017	Winter	7	18-24	F	3197
2017	Winter	7	18-24	F	3106
2017	Winter	7	18-24	F	3135
2017	Winter	7	18-24	M	3251
2017	Winter	7	24-30	F	3384
2017	Winter	7	24-30	F	3412
2017	Winter	7	24-30	F	3320
2017	Winter	7	30-36	F	3634
2017	Winter	7	30-36	F	3570
2017	Winter	7	36-42	M	3706
2017	Winter	7	42<	M	3912
2017	Winter	8	18>	N	0
2017	Winter	8	18>	N	0
2017	Winter	8	18>	N	0
2017	Winter	8	18>	N	0
2017	Winter	8	18>	N	0
2017	Winter	8	18>	N	0
2017	Winter	8	18>	N	0
2017	Winter	8	18>	N	0
2017	Winter	8	18>	N	0
2017	Winter	8	18>	N	0
2017	Winter	8	18>	N	0
2017	Winter	8	18>	N	0
2017	Winter	8	18>	N	0
2017	Winter	8	18>	N	0
2017	Winter	8	18>	N	0
2017	Winter	8	18>	N	0
2017	Winter	8	18>	N	0
2017	Winter	8	18>	N	0
2017	Winter	8	18-24	F	3257
2017	Winter	8	18-24	F	3303
2017	Winter	8	18-24	F	3251
2017	Winter	8	18-24	F	3299
2017	Winter	8	24-30	F	3311
2017	Winter	8	24-30	F	3403
2017	Winter	8	30-36	M	3658
2017	Winter	8	36-42	F	3861
2017	Winter	8	36-42	F	3916
2017	Winter	8	36-42	F	3824
2017	Winter	8	42<	F	4245
2017	Winter	8	42<	M	4102
2017	Winter	10	18>	N	0
2017	Winter	10	18>	N	0
2017	Winter	10	18>	N	0
2017	Winter	10	18>	N	0
2017	Winter	10	18>	N	0
2017	Winter	10	18>	N	0
2017	Winter	10	18>	N	0
2017	Winter	10	18>	N	0
2017	Winter	10	18>	N	0
2017	Winter	10	18>	N	0
2017	Winter	10	18>	N	0
2017	Winter	10	18>	N	0
2017	Winter	10	18>	N	0
2017	Winter	10	18>	N	0
2017	Winter	10	18>	N	0
2017	Winter	10	18>	N	0
2017	Winter	10	18>	N	0
2017	Winter	10	18>	N	0
2017	Winter	10	18>	N	0
2017	Winter	10	18>	N	0
2017	Winter	10	18>	N	0
2017	Winter	10	18>	N	0
2017	Winter	10	18-24	F	2921
2017	Winter	10	18-24	F	2834
2017	Winter	10	18-24	F	2920
2017	Winter	10	18-24	F	2847
2017	Winter	10	18-24	F	2792
2017	Winter	10	18-24	M	2856
2017	Winter	10	24-30	F	3119
2017	Winter	10	24-30	F	3086
2017	Winter	10	24-30	F	3014
2017	Winter	10	24-30	F	2973
2017	Winter	10	30-36	F	3464
2017	Winter	10	30-36	M	3135
2017	Winter	10	36-42	M	3316
2017	Winter	10	42<	F	3568
2017	Winter	12	18>	N	0
2017	Winter	12	18>	N	0
2017	Winter	12	18>	N	0
2017	Winter	12	18>	N	0
2017	Winter	12	18>	N	0
2017	Winter	12	18>	N	0
2017	Winter	12	18>	N	0
2017	Winter	12	18>	N	0
2017	Winter	12	18>	N	0
2017	Winter	12	18>	N	0
2017	Winter	12	18>	N	0
2017	Winter	12	18>	N	0
2017	Winter	12	18>	N	0
2017	Winter	12	18>	N	0
2017	Winter	12	18-24	F	2897
2017	Winter	12	18-24	F	2910
2017	Winter	12	18-24	M	2981
2017	Winter	12	24-30	F	3004
2017	Winter	12	24-30	F	2955
2017	Winter	12	24-30	F	3029
2017	Winter	12	30-36	F	3283
2017	Winter	12	36-42	M	3428
2017	Winter	12	36-42	M	3482
2017	Winter	12	42<	F	3786
2017	Winter	12	42<	F	3590
2017	Winter	14	18>	N	0
2017	Winter	14	18>	N	0
2017	Winter	14	18>	N	0
2017	Winter	14	18>	N	0
2017	Winter	14	18>	N	0
2017	Winter	14	18>	N	0
2017	Winter	14	18>	N	0
2017	Winter	14	18>	N	0
2017	Winter	14	18>	N	0
2017	Winter	14	18>	N	0
2017	Winter	14	18>	N	0
2017	Winter	14	18>	N	0
2017	Winter	14	18>	N	0
2017	Winter	14	18>	N	0
2017	Winter	14	18>	N	0
2017	Winter	14	18>	N	0
2017	Winter	14	18>	N	0
2017	Winter	14	18>	N	0
2017	Winter	14	18-24	F	3171
2017	Winter	14	18-24	F	3095
2017	Winter	14	18-24	M	3132
2017	Winter	14	24-30	F	3294
2017	Winter	14	24-30	F	3180
2017	Winter	14	24-30	M	3236
2017	Winter	14	30-36	F	3582
2017	Winter	14	30-36	F	3290
2017	Winter	14	30-36	F	3372
2017	Winter	14	36-42	F	3604
2017	Winter	14	42<	M	3798
2017	Winter	15	18>	N	0
2017	Winter	15	18>	N	0
2017	Winter	15	18>	N	0
2017	Winter	15	18>	N	0
2017	Winter	15	18>	N	0
2017	Winter	15	18>	N	0
2017	Winter	15	18>	N	0
2017	Winter	15	18>	N	0
2017	Winter	15	18>	N	0
2017	Winter	15	18>	N	0
2017	Winter	15	18>	N	0
2017	Winter	15	18>	N	0
2017	Winter	15	18>	N	0
2017	Winter	15	18-24	F	3208
2017	Winter	15	18-24	F	3276
2017	Winter	15	18-24	F	3191
2017	Winter	15	24-30	F	3319
2017	Winter	15	24-30	F	3257
2017	Winter	15	30-36	F	3512
2017	Winter	15	30-36	M	3371
2017	Winter	15	36-42	M	3622
2017	Winter	15	42<	F	3715
2017	Winter	19	18>	N	0
2017	Winter	19	18>	N	0
2017	Winter	19	18>	N	0
2017	Winter	19	18>	N	0
2017	Winter	19	18>	N	0
2017	Winter	19	18>	N	0
2017	Winter	19	18>	N	0
2017	Winter	19	18>	N	0
2017	Winter	19	18>	N	0
2017	Winter	19	18-24	F	3110
2017	Winter	19	18-24	F	3073
2017	Winter	19	18-24	F	3174
2017	Winter	19	24-30	M	3301
2017	Winter	19	30-36	F	3507
2017	Winter	19	30-36	F	3358
2017	Winter	19	36-42	F	3558
2017	Winter	19	42<	M	3729
2017	Winter	20	18>	N	0
2017	Winter	20	18>	N	0
2017	Winter	20	18>	N	0
2017	Winter	20	18>	N	0
2017	Winter	20	18>	N	0
2017	Winter	20	18>	N	0
2017	Winter	20	18>	N	0
2017	Winter	20	18>	N	0
2017	Winter	20	18>	N	0
2017	Winter	20	18>	N	0
2017	Winter	20	18>	N	0
2017	Winter	20	18>	N	0
2017	Winter	20	18>	N	0
2017	Winter	20	18-24	F	3253
2017	Winter	20	18-24	F	3200
2017	Winter	20	24-30	F	3254
2017	Winter	20	24-30	M	3544
2017	Winter	20	30-36	F	3725
2017	Winter	20	30-36	M	3616
2017	Winter	20	36-42	F	3844
2017	Winter	20	42<	F	4145
2017	Spring	1	18>	N	0
2017	Spring	1	18>	N	0
2017	Spring	1	18>	N	0
2017	Spring	1	18>	N	0
2017	Spring	1	18>	N	0
2017	Spring	1	18>	N	0
2017	Spring	1	18>	N	0
2017	Spring	1	18-24	M	3196
2017	Spring	1	24-30	F	3248
2017	Spring	1	24-30	F	3293
2017	Spring	1	30-36	F	3482
2017	Spring	1	36-42	M	3879
2017	Spring	2	18>	N	0
2017	Spring	2	18>	N	0
2017	Spring	2	18>	N	0
2017	Spring	2	18>	N	0
2017	Spring	2	18>	N	0
2017	Spring	2	18>	N	0
2017	Spring	2	18>	N	0
2017	Spring	2	18>	N	0
2017	Spring	2	18>	N	0
2017	Spring	2	18>	N	0
2017	Spring	2	18>	N	0
2017	Spring	2	18-24	F	3053
2017	Spring	2	18-24	F	3089
2017	Spring	2	18-24	M	3102
2017	Spring	2	24-30	F	3111
2017	Spring	2	24-30	F	3138
2017	Spring	2	30-36	M	3467
2017	Spring	2	36-42	F	3690
2017	Spring	2	42<	F	4014
2017	Spring	3	18>	N	0
2017	Spring	3	18>	N	0
2017	Spring	3	18>	N	0
2017	Spring	3	18>	N	0
2017	Spring	3	18>	N	0
2017	Spring	3	18>	N	0
2017	Spring	3	18>	N	0
2017	Spring	3	18-24	F	3044
2017	Spring	3	18-24	M	3126
2017	Spring	3	24-30	F	3242
2017	Spring	3	24-30	F	3210
2017	Spring	3	24-30	F	3289
2017	Spring	3	30-36	F	3348
2017	Spring	3	30-36	M	3350
2017	Spring	4	18>	N	0
2017	Spring	4	18>	N	0
2017	Spring	4	18>	N	0
2017	Spring	4	18>	N	0
2017	Spring	4	18>	N	0
2017	Spring	4	18>	N	0
2017	Spring	4	18>	N	0
2017	Spring	4	18>	N	0
2017	Spring	4	18-24	F	3283
2017	Spring	4	18-24	F	3269
2017	Spring	4	18-24	M	3316
2017	Spring	4	24-30	F	3426
2017	Spring	4	24-30	M	3261
2017	Spring	4	30-36	F	3534
2017	Spring	4	30-36	F	3582
2017	Spring	4	42<	F	3890
2017	Spring	4	42<	M	3724
2017	Spring	5	18>	N	0
2017	Spring	5	18>	N	0
2017	Spring	5	18>	N	0
2017	Spring	5	18>	N	0
2017	Spring	5	18>	N	0
2017	Spring	5	18>	N	0
2017	Spring	5	18>	N	0
2017	Spring	5	18>	N	0
2017	Spring	5	18>	N	0
2017	Spring	5	18-24	F	3067
2017	Spring	5	18-24	F	2984
2017	Spring	5	18-24	F	2996
2017	Spring	5	24-30	F	3159
2017	Spring	5	24-30	F	3198
2017	Spring	5	30-36	M	3485
2017	Spring	5	42<	M	3930
2017	Spring	7	18>	N	0
2017	Spring	7	18>	N	0
2017	Spring	7	18>	N	0
2017	Spring	7	18>	N	0
2017	Spring	7	18>	N	0
2017	Spring	7	18>	N	0
2017	Spring	7	18>	N	0
2017	Spring	7	18>	N	0
2017	Spring	7	18>	N	0
2017	Spring	7	18>	N	0
2017	Spring	7	18>	N	0
2017	Spring	7	18>	N	0
2017	Spring	7	18>	N	0
2017	Spring	7	18>	N	0
2017	Spring	7	18>	N	0
2017	Spring	7	18-24	F	3170
2017	Spring	7	18-24	F	3266
2017	Spring	7	18-24	M	3204
2017	Spring	7	24-30	F	3382
2017	Spring	7	24-30	F	3273
2017	Spring	7	24-30	F	3354
2017	Spring	7	24-30	M	3306
2017	Spring	7	30-36	F	3527
2017	Spring	7	30-36	F	3459
2017	Spring	7	36-42	F	3651
2017	Spring	7	36-42	F	3528
2017	Spring	7	42<	M	4980
2017	Spring	8	18>	N	0
2017	Spring	8	18>	N	0
2017	Spring	8	18>	N	0
2017	Spring	8	18>	N	0
2017	Spring	8	18>	N	0
2017	Spring	8	18>	N	0
2017	Spring	8	18>	N	0
2017	Spring	8	18>	N	0
2017	Spring	8	18>	N	0
2017	Spring	8	18>	N	0
2017	Spring	8	18>	N	0
2017	Spring	8	18>	N	0
2017	Spring	8	18>	N	0
2017	Spring	8	18>	N	0
2017	Spring	8	18>	N	0
2017	Spring	8	18>	N	0
2017	Spring	8	18>	N	0
2017	Spring	8	18-24	F	3333
2017	Spring	8	18-24	F	3397
2017	Spring	8	24-30	F	3420
2017	Spring	8	24-30	F	3467
2017	Spring	8	24-30	M	3359
2017	Spring	8	30-36	F	3468
2017	Spring	8	30-36	F	3507
2017	Spring	8	36-42	F	3889
2017	Spring	8	36-42	M	3699
2017	Spring	8	42<	F	4026
2017	Spring	8	42<	M	4118
2017	Spring	10	18>	N	0
2017	Spring	10	18>	N	0
2017	Spring	10	18>	N	0
2017	Spring	10	18>	N	0
2017	Spring	10	18>	N	0
2017	Spring	10	18>	N	0
2017	Spring	10	18>	N	0
2017	Spring	10	18>	N	0
2017	Spring	10	18>	N	0
2017	Spring	10	18>	N	0
2017	Spring	10	18>	N	0
2017	Spring	10	18>	N	0
2017	Spring	10	18>	N	0
2017	Spring	10	18>	N	0
2017	Spring	10	18>	N	0
2017	Spring	10	18>	N	0
2017	Spring	10	18>	N	0
2017	Spring	10	18>	N	0
2017	Spring	10	18>	N	0
2017	Spring	10	18>	N	0
2017	Spring	10	18>	N	0
2017	Spring	10	18>	N	0
2017	Spring	10	18-24	F	2938
2017	Spring	10	18-24	F	2864
2017	Spring	10	18-24	F	2830
2017	Spring	10	18-24	F	2915
2017	Spring	10	18-24	F	2869
2017	Spring	10	18-24	M	2871
2017	Spring	10	24-30	F	2995
2017	Spring	10	24-30	F	3019
2017	Spring	10	24-30	F	3098
2017	Spring	10	24-30	F	3136
2017	Spring	10	30-36	F	3056
2017	Spring	10	30-36	M	3114
2017	Spring	10	36-42	F	3274
2017	Spring	10	36-42	M	3366
2017	Spring	10	42<	F	3569
2017	Spring	12	18>	N	0
2017	Spring	12	18>	N	0
2017	Spring	12	18>	N	0
2017	Spring	12	18>	N	0
2017	Spring	12	18>	N	0
2017	Spring	12	18>	N	0
2017	Spring	12	18>	N	0
2017	Spring	12	18>	N	0
2017	Spring	12	18>	N	0
2017	Spring	12	18>	N	0
2017	Spring	12	18>	N	0
2017	Spring	12	18>	N	0
2017	Spring	12	18>	N	0
2017	Spring	12	18-24	F	2825
2017	Spring	12	18-24	F	2843
2017	Spring	12	18-24	F	2761
2017	Spring	12	18-24	M	2856
2017	Spring	12	24-30	F	3014
2017	Spring	12	30-36	F	3257
2017	Spring	12	30-36	F	3294
2017	Spring	12	36-42	F	3407
2017	Spring	12	36-42	M	3466
2017	Spring	12	42<	F	3729
2017	Spring	12	42<	F	3624
2017	Spring	12	42<	M	3555
2017	Spring	14	18>	N	0
2017	Spring	14	18>	N	0
2017	Spring	14	18>	N	0
2017	Spring	14	18>	N	0
2017	Spring	14	18>	N	0
2017	Spring	14	18>	N	0
2017	Spring	14	18>	N	0
2017	Spring	14	18>	N	0
2017	Spring	14	18>	N	0
2017	Spring	14	18>	N	0
2017	Spring	14	18>	N	0
2017	Spring	14	18>	N	0
2017	Spring	14	18>	N	0
2017	Spring	14	18>	N	0
2017	Spring	14	18>	N	0
2017	Spring	14	18>	N	0
2017	Spring	14	18>	N	0
2017	Spring	14	18-24	F	3164
2017	Spring	14	18-24	F	3113
2017	Spring	14	18-24	F	3092
2017	Spring	14	18-24	M	3205
2017	Spring	14	24-30	F	3257
2017	Spring	14	24-30	F	3193
2017	Spring	14	24-30	F	3266
2017	Spring	14	24-30	F	3208
2017	Spring	14	30-36	M	3314
2017	Spring	14	36-42	F	3612
2017	Spring	14	42<	F	3746
2017	Spring	14	42<	M	3740
2017	Spring	15	18>	N	0
2017	Spring	15	18>	N	0
2017	Spring	15	18>	N	0
2017	Spring	15	18>	N	0
2017	Spring	15	18>	N	0
2017	Spring	15	18>	N	0
2017	Spring	15	18>	N	0
2017	Spring	15	18>	N	0
2017	Spring	15	18>	N	0
2017	Spring	15	18>	N	0
2017	Spring	15	18>	N	0
2017	Spring	15	18>	N	0
2017	Spring	15	18>	N	0
2017	Spring	15	18>	N	0
2017	Spring	15	18-24	F	3215
2017	Spring	15	18-24	F	3273
2017	Spring	15	18-24	F	3197
2017	Spring	15	18-24	M	3260
2017	Spring	15	24-30	F	3342
2017	Spring	15	24-30	F	3396
2017	Spring	15	30-36	F	3483
2017	Spring	15	36-42	F	3601
2017	Spring	15	36-42	M	3689
2017	Spring	19	18>	N	0
2017	Spring	19	18>	N	0
2017	Spring	19	18>	N	0
2017	Spring	19	18>	N	0
2017	Spring	19	18>	N	0
2017	Spring	19	18>	N	0
2017	Spring	19	18>	N	0
2017	Spring	19	18>	N	0
2017	Spring	19	18>	N	0
2017	Spring	19	18>	N	0
2017	Spring	19	18-24	F	3216
2017	Spring	19	18-24	F	3190
2017	Spring	19	24-30	F	3207
2017	Spring	19	24-30	M	3414
2017	Spring	19	30-36	F	3527
2017	Spring	19	36-42	F	3592
2017	Spring	19	42<	M	3740
2017	Spring	20	18>	N	0
2017	Spring	20	18>	N	0
2017	Spring	20	18>	N	0
2017	Spring	20	18>	N	0
2017	Spring	20	18>	N	0
2017	Spring	20	18>	N	0
2017	Spring	20	18>	N	0
2017	Spring	20	18>	N	0
2017	Spring	20	18>	N	0
2017	Spring	20	18>	N	0
2017	Spring	20	18>	N	0
2017	Spring	20	18>	N	0
2017	Spring	20	18>	N	0
2017	Spring	20	18>	N	0
2017	Spring	20	18-24	F	3249
2017	Spring	20	18-24	F	3296
2017	Spring	20	24-30	F	3319
2017	Spring	20	30-36	M	3597
2017	Spring	20	30-36	M	3669
2017	Spring	20	36-42	F	3891
2017	Spring	20	42<	F	4156
2017	Summer	1	18>	N	0
2017	Summer	1	18>	N	0
2017	Summer	1	18>	N	0
2017	Summer	1	18>	N	0
2017	Summer	1	18>	N	0
2017	Summer	1	18>	N	0
2017	Summer	1	18>	N	0
2017	Summer	1	18>	N	0
2017	Summer	1	18-24	F	3187
2017	Summer	1	18-24	M	3275
2017	Summer	1	24-30	F	3365
2017	Summer	1	30-36	F	3539
2017	Summer	1	42<	M	3900
2017	Summer	2	18>	N	0
2017	Summer	2	18>	N	0
2017	Summer	2	18>	N	0
2017	Summer	2	18>	N	0
2017	Summer	2	18>	N	0
2017	Summer	2	18>	N	0
2017	Summer	2	18>	N	0
2017	Summer	2	18>	N	0
2017	Summer	2	18>	N	0
2017	Summer	2	18>	N	0
2017	Summer	2	18-24	F	3032
2017	Summer	2	18-24	F	3046
2017	Summer	2	18-24	M	3174
2017	Summer	2	24-30	F	3128
2017	Summer	2	24-30	F	3173
2017	Summer	2	24-30	F	3151
2017	Summer	2	30-36	F	3124
2017	Summer	2	30-36	F	3140
2017	Summer	2	36-42	M	3579
2017	Summer	3	18>	N	0
2017	Summer	3	18>	N	0
2017	Summer	3	18>	N	0
2017	Summer	3	18>	N	0
2017	Summer	3	18>	N	0
2017	Summer	3	18>	N	0
2017	Summer	3	18>	N	0
2017	Summer	3	18-24	F	3007
2017	Summer	3	18-24	M	3163
2017	Summer	3	24-30	F	3223
2017	Summer	3	24-30	F	3006
2017	Summer	3	30-36	F	3320
2017	Summer	3	36-42	M	3411
2017	Summer	4	18>	N	0
2017	Summer	4	18>	N	0
2017	Summer	4	18>	N	0
2017	Summer	4	18>	N	0
2017	Summer	4	18>	N	0
2017	Summer	4	18>	N	0
2017	Summer	4	18>	N	0
2017	Summer	4	18>	N	0
2017	Summer	4	18-24	F	3269
2017	Summer	4	18-24	F	3271
2017	Summer	4	18-24	F	3228
2017	Summer	4	24-30	F	3380
2017	Summer	4	24-30	F	3425
2017	Summer	4	30-36	F	3570
2017	Summer	4	30-36	F	3527
2017	Summer	4	36-42	F	3633
2017	Summer	4	42<	M	3736
2017	Summer	5	18>	N	0
2017	Summer	5	18>	N	0
2017	Summer	5	18>	N	0
2017	Summer	5	18>	N	0
2017	Summer	5	18>	N	0
2017	Summer	5	18>	N	0
2017	Summer	5	18>	N	0
2017	Summer	5	18>	N	0
2017	Summer	5	18>	N	0
2017	Summer	5	18-24	F	3021
2017	Summer	5	18-24	F	3058
2017	Summer	5	18-24	F	2990
2017	Summer	5	18-24	F	3016
2017	Summer	5	24-30	F	3147
2017	Summer	5	30-36	F	3246
2017	Summer	5	36-42	M	3506
2017	Summer	7	18>	N	0
2017	Summer	7	18>	N	0
2017	Summer	7	18>	N	0
2017	Summer	7	18>	N	0
2017	Summer	7	18>	N	0
2017	Summer	7	18>	N	0
2017	Summer	7	18>	N	0
2017	Summer	7	18>	N	0
2017	Summer	7	18>	N	0
2017	Summer	7	18>	N	0
2017	Summer	7	18>	N	0
2017	Summer	7	18>	N	0
2017	Summer	7	18>	N	0
2017	Summer	7	18>	N	0
2017	Summer	7	18>	N	0
2017	Summer	7	18>	N	0
2017	Summer	7	18-24	F	3284
2017	Summer	7	18-24	F	3191
2017	Summer	7	18-24	F	3254
2017	Summer	7	18-24	M	3243
2017	Summer	7	24-30	F	3416
2017	Summer	7	24-30	F	3326
2017	Summer	7	24-30	F	3350
2017	Summer	7	24-30	F	3279
2017	Summer	7	24-30	M	3408
2017	Summer	7	30-36	F	3577
2017	Summer	7	30-36	F	3500
2017	Summer	7	36-42	F	3617
2017	Summer	7	42<	F	3720
2017	Summer	7	42<	M	4011
2017	Summer	8	18>	N	0
2017	Summer	8	18>	N	0
2017	Summer	8	18>	N	0
2017	Summer	8	18>	N	0
2017	Summer	8	18>	N	0
2017	Summer	8	18>	N	0
2017	Summer	8	18>	N	0
2017	Summer	8	18>	N	0
2017	Summer	8	18>	N	0
2017	Summer	8	18>	N	0
2017	Summer	8	18>	N	0
2017	Summer	8	18>	N	0
2017	Summer	8	18>	N	0
2017	Summer	8	18>	N	0
2017	Summer	8	18>	N	0
2017	Summer	8	18>	N	0
2017	Summer	8	18-24	F	3415
2017	Summer	8	18-24	F	3368
2017	Summer	8	18-24	F	3409
2017	Summer	8	18-24	F	3328
2017	Summer	8	24-30	F	3472
2017	Summer	8	24-30	M	3405
2017	Summer	8	30-36	F	3525
2017	Summer	8	36-42	F	3688
2017	Summer	8	36-42	M	4223
2017	Summer	8	42<	F	4031
2017	Summer	8	42<	F	3915
2017	Summer	10	18>	N	0
2017	Summer	10	18>	N	0
2017	Summer	10	18>	N	0
2017	Summer	10	18>	N	0
2017	Summer	10	18>	N	0
2017	Summer	10	18>	N	0
2017	Summer	10	18>	N	0
2017	Summer	10	18>	N	0
2017	Summer	10	18>	N	0
2017	Summer	10	18>	N	0
2017	Summer	10	18>	N	0
2017	Summer	10	18>	N	0
2017	Summer	10	18>	N	0
2017	Summer	10	18>	N	0
2017	Summer	10	18>	N	0
2017	Summer	10	18>	N	0
2017	Summer	10	18>	N	0
2017	Summer	10	18>	N	0
2017	Summer	10	18>	N	0
2017	Summer	10	18>	N	0
2017	Summer	10	18>	N	0
2017	Summer	10	18-24	F	2842
2017	Summer	10	18-24	F	2860
2017	Summer	10	18-24	F	2903
2017	Summer	10	18-24	M	2918
2017	Summer	10	18-24	M	2827
2017	Summer	10	24-30	F	3012
2017	Summer	10	24-30	F	2963
2017	Summer	10	24-30	F	2941
2017	Summer	10	24-30	M	2906
2017	Summer	10	30-36	F	2963
2017	Summer	10	30-36	F	3072
2017	Summer	10	30-36	F	2903
2017	Summer	10	36-42	F	3059
2017	Summer	10	36-42	M	3132
2017	Summer	10	42<	M	3429
2017	Summer	12	18>	N	0
2017	Summer	12	18>	N	0
2017	Summer	12	18>	N	0
2017	Summer	12	18>	N	0
2017	Summer	12	18>	N	0
2017	Summer	12	18>	N	0
2017	Summer	12	18>	N	0
2017	Summer	12	18>	N	0
2017	Summer	12	18>	N	0
2017	Summer	12	18>	N	0
2017	Summer	12	18>	N	0
2017	Summer	12	18>	N	0
2017	Summer	12	18>	N	0
2017	Summer	12	18-24	F	2745
2017	Summer	12	18-24	F	2736
2017	Summer	12	18-24	F	2714
2017	Summer	12	24-30	F	3067
2017	Summer	12	24-30	M	2991
2017	Summer	12	30-36	F	3218
2017	Summer	12	30-36	F	3324
2017	Summer	12	36-42	F	3412
2017	Summer	12	36-42	F	3500
2017	Summer	12	42<	F	3804
2017	Summer	12	42<	M	3614
2017	Summer	14	18>	N	0
2017	Summer	14	18>	N	0
2017	Summer	14	18>	N	0
2017	Summer	14	18>	N	0
2017	Summer	14	18>	N	0
2017	Summer	14	18>	N	0
2017	Summer	14	18>	N	0
2017	Summer	14	18>	N	0
2017	Summer	14	18>	N	0
2017	Summer	14	18>	N	0
2017	Summer	14	18>	N	0
2017	Summer	14	18>	N	0
2017	Summer	14	18>	N	0
2017	Summer	14	18>	N	0
2017	Summer	14	18>	N	0
2017	Summer	14	18>	N	0
2017	Summer	14	18-24	F	3125
2017	Summer	14	18-24	F	3188
2017	Summer	14	18-24	F	3074
2017	Summer	14	18-24	F	3100
2017	Summer	14	24-30	F	3316
2017	Summer	14	24-30	F	3270
2017	Summer	14	24-30	M	3262
2017	Summer	14	30-36	F	3302
2017	Summer	14	30-36	M	3381
2017	Summer	14	36-42	F	3510
2017	Summer	14	36-42	F	3569
2017	Summer	14	36-42	F	3602
2017	Summer	15	18>	N	0
2017	Summer	15	18>	N	0
2017	Summer	15	18>	N	0
2017	Summer	15	18>	N	0
2017	Summer	15	18>	N	0
2017	Summer	15	18>	N	0
2017	Summer	15	18>	N	0
2017	Summer	15	18>	N	0
2017	Summer	15	18>	N	0
2017	Summer	15	18>	N	0
2017	Summer	15	18>	N	0
2017	Summer	15	18>	N	0
2017	Summer	15	18>	N	0
2017	Summer	15	18>	N	0
2017	Summer	15	18-24	F	3278
2017	Summer	15	18-24	F	3199
2017	Summer	15	18-24	F	3294
2017	Summer	15	18-24	M	3287
2017	Summer	15	24-30	F	3293
2017	Summer	15	24-30	F	3370
2017	Summer	15	24-30	F	3404
2017	Summer	15	30-36	F	3558
2017	Summer	15	36-42	F	3642
2017	Summer	15	42<	M	3755
2017	Summer	19	18>	N	0
2017	Summer	19	18>	N	0
2017	Summer	19	18>	N	0
2017	Summer	19	18>	N	0
2017	Summer	19	18>	N	0
2017	Summer	19	18>	N	0
2017	Summer	19	18>	N	0
2017	Summer	19	18>	N	0
2017	Summer	19	18>	N	0
2017	Summer	19	18-24	F	3198
2017	Summer	19	18-24	F	3152
2017	Summer	19	18-24	M	3249
2017	Summer	19	24-30	F	3228
2017	Summer	19	30-36	M	3473
2017	Summer	19	36-42	F	3575
2017	Summer	19	42<	F	3594
2017	Summer	20	18>	N	0
2017	Summer	20	18>	N	0
2017	Summer	20	18>	N	0
2017	Summer	20	18>	N	0
2017	Summer	20	18>	N	0
2017	Summer	20	18>	N	0
2017	Summer	20	18>	N	0
2017	Summer	20	18>	N	0
2017	Summer	20	18>	N	0
2017	Summer	20	18>	N	0
2017	Summer	20	18>	N	0
2017	Summer	20	18>	N	0
2017	Summer	20	18>	N	0
2017	Summer	20	18>	N	0
2017	Summer	20	18>	N	0
2017	Summer	20	18-24	F	3315
2017	Summer	20	18-24	F	3282
2017	Summer	20	24-30	F	3361
2017	Summer	20	24-30	F	3350
2017	Summer	20	30-36	F	3364
2017	Summer	20	30-36	M	3623
2017	Summer	20	36-42	M	3708
2017	Fall	1	18>	N	0
2017	Fall	1	18>	N	0
2017	Fall	1	18>	N	0
2017	Fall	1	18>	N	0
2017	Fall	1	18>	N	0
2017	Fall	1	18>	N	0
2017	Fall	1	18>	N	0
2017	Fall	1	18-24	F	3227
2017	Fall	1	24-30	M	3329
2017	Fall	1	36-42	F	3616
2017	Fall	1	42<	M	3880
2017	Fall	2	18>	N	0
2017	Fall	2	18>	N	0
2017	Fall	2	18>	N	0
2017	Fall	2	18>	N	0
2017	Fall	2	18>	N	0
2017	Fall	2	18>	N	0
2017	Fall	2	18>	N	0
2017	Fall	2	18>	N	0
2017	Fall	2	18-24	F	3005
2017	Fall	2	18-24	F	3029
2017	Fall	2	24-30	M	3207
2017	Fall	2	30-36	F	3130
2017	Fall	2	30-36	F	3117
2017	Fall	2	36-42	F	3662
2017	Fall	2	36-42	M	3541
2017	Fall	3	18>	N	0
2017	Fall	3	18>	N	0
2017	Fall	3	18>	N	0
2017	Fall	3	18>	N	0
2017	Fall	3	18>	N	0
2017	Fall	3	18>	N	0
2017	Fall	3	18-24	F	2988
2017	Fall	3	18-24	F	3014
2017	Fall	3	18-24	F	3027
2017	Fall	3	24-30	F	3211
2017	Fall	3	24-30	M	3185
2017	Fall	3	30-36	F	3375
2017	Fall	3	36-42	M	3489
2017	Fall	4	18>	N	0
2017	Fall	4	18>	N	0
2017	Fall	4	18>	N	0
2017	Fall	4	18>	N	0
2017	Fall	4	18>	N	0
2017	Fall	4	18>	N	0
2017	Fall	4	18-24	F	3190
2017	Fall	4	18-24	F	3245
2017	Fall	4	24-30	F	3397
2017	Fall	4	24-30	F	3346
2017	Fall	4	30-36	F	3619
2017	Fall	4	30-36	M	3832
2017	Fall	4	36-42	F	3711
2017	Fall	5	18>	N	0
2017	Fall	5	18>	N	0
2017	Fall	5	18>	N	0
2017	Fall	5	18>	N	0
2017	Fall	5	18>	N	0
2017	Fall	5	18>	N	0
2017	Fall	5	18>	N	0
2017	Fall	5	18-24	F	3073
2017	Fall	5	18-24	M	3091
2017	Fall	5	24-30	F	3162
2017	Fall	5	24-30	F	3100
2017	Fall	5	30-36	F	3283
2017	Fall	5	36-42	F	3597
2017	Fall	5	36-42	M	3584
2017	Fall	7	18>	N	0
2017	Fall	7	18>	N	0
2017	Fall	7	18>	N	0
2017	Fall	7	18>	N	0
2017	Fall	7	18>	N	0
2017	Fall	7	18>	N	0
2017	Fall	7	18>	N	0
2017	Fall	7	18>	N	0
2017	Fall	7	18>	N	0
2017	Fall	7	18>	N	0
2017	Fall	7	18>	N	0
2017	Fall	7	18>	N	0
2017	Fall	7	18>	N	0
2017	Fall	7	18-24	F	3005
2017	Fall	7	18-24	F	3076
2017	Fall	7	18-24	F	3014
2017	Fall	7	24-30	F	3149
2017	Fall	7	24-30	F	3267
2017	Fall	7	24-30	F	3152
2017	Fall	7	24-30	M	3288
2017	Fall	7	30-36	F	3500
2017	Fall	7	30-36	F	3415
2017	Fall	7	30-36	M	3524
2017	Fall	7	36-42	F	3636
2017	Fall	7	36-42	F	3545
2017	Fall	7	42<	F	3714
2017	Fall	8	18>	N	0
2017	Fall	8	18>	N	0
2017	Fall	8	18>	N	0
2017	Fall	8	18>	N	0
2017	Fall	8	18>	N	0
2017	Fall	8	18>	N	0
2017	Fall	8	18>	N	0
2017	Fall	8	18>	N	0
2017	Fall	8	18>	N	0
2017	Fall	8	18>	N	0
2017	Fall	8	18>	N	0
2017	Fall	8	18>	N	0
2017	Fall	8	18>	N	0
2017	Fall	8	18>	N	0
2017	Fall	8	18>	N	0
2017	Fall	8	18>	N	0
2017	Fall	8	18-24	F	3477
2017	Fall	8	18-24	F	3362
2017	Fall	8	18-24	F	3318
2017	Fall	8	18-24	M	3336
2017	Fall	8	24-30	F	3479
2017	Fall	8	24-30	M	3744
2017	Fall	8	30-36	F	3501
2017	Fall	8	36-42	F	3710
2017	Fall	8	36-42	M	4292
2017	Fall	8	42<	F	3894
2017	Fall	8	42<	F	4000
2017	Fall	10	18>	N	0
2017	Fall	10	18>	N	0
2017	Fall	10	18>	N	0
2017	Fall	10	18>	N	0
2017	Fall	10	18>	N	0
2017	Fall	10	18>	N	0
2017	Fall	10	18>	N	0
2017	Fall	10	18>	N	0
2017	Fall	10	18>	N	0
2017	Fall	10	18>	N	0
2017	Fall	10	18>	N	0
2017	Fall	10	18>	N	0
2017	Fall	10	18>	N	0
2017	Fall	10	18>	N	0
2017	Fall	10	18>	N	0
2017	Fall	10	18>	N	0
2017	Fall	10	18>	N	0
2017	Fall	10	18>	N	0
2017	Fall	10	18>	N	0
2017	Fall	10	18>	N	0
2017	Fall	10	18-24	F	2903
2017	Fall	10	18-24	F	2837
2017	Fall	10	18-24	F	2862
2017	Fall	10	24-30	F	2957
2017	Fall	10	24-30	F	2861
2017	Fall	10	24-30	F	3059
2017	Fall	10	24-30	F	2994
2017	Fall	10	24-30	F	3076
2017	Fall	10	24-30	M	3005
2017	Fall	10	30-36	F	2966
2017	Fall	10	30-36	F	2904
2017	Fall	10	36-42	F	3106
2017	Fall	10	36-42	M	3149
2017	Fall	10	42<	M	3480
2017	Fall	12	18>	N	0
2017	Fall	12	18>	N	0
2017	Fall	12	18>	N	0
2017	Fall	12	18>	N	0
2017	Fall	12	18>	N	0
2017	Fall	12	18>	N	0
2017	Fall	12	18>	N	0
2017	Fall	12	18>	N	0
2017	Fall	12	18>	N	0
2017	Fall	12	18>	N	0
2017	Fall	12	18>	N	0
2017	Fall	12	18>	N	0
2017	Fall	12	18>	N	0
2017	Fall	12	18>	N	0
2017	Fall	12	18-24	F	2741
2017	Fall	12	18-24	F	2866
2017	Fall	12	18-24	F	2728
2017	Fall	12	18-24	M	2768
2017	Fall	12	24-30	F	2873
2017	Fall	12	24-30	M	3088
2017	Fall	12	30-36	F	3243
2017	Fall	12	30-36	F	3168
2017	Fall	12	36-42	F	3473
2017	Fall	12	36-42	F	3356
2017	Fall	12	36-42	F	3408
2017	Fall	12	42<	M	3669
2017	Fall	14	18>	N	0
2017	Fall	14	18>	N	0
2017	Fall	14	18>	N	0
2017	Fall	14	18>	N	0
2017	Fall	14	18>	N	0
2017	Fall	14	18>	N	0
2017	Fall	14	18>	N	0
2017	Fall	14	18>	N	0
2017	Fall	14	18>	N	0
2017	Fall	14	18>	N	0
2017	Fall	14	18>	N	0
2017	Fall	14	18>	N	0
2017	Fall	14	18>	N	0
2017	Fall	14	18>	N	0
2017	Fall	14	18-24	F	3171
2017	Fall	14	18-24	F	3043
2017	Fall	14	18-24	M	3129
2017	Fall	14	24-30	F	3195
2017	Fall	14	24-30	F	3227
2017	Fall	14	24-30	F	3286
2017	Fall	14	24-30	M	3317
2017	Fall	14	30-36	F	3424
2017	Fall	14	30-36	F	3380
2017	Fall	14	30-36	F	3473
2017	Fall	14	36-42	F	3522
2017	Fall	14	36-42	F	3499
2017	Fall	14	36-42	M	3463
2017	Fall	15	18>	N	0
2017	Fall	15	18>	N	0
2017	Fall	15	18>	N	0
2017	Fall	15	18>	N	0
2017	Fall	15	18>	N	0
2017	Fall	15	18>	N	0
2017	Fall	15	18>	N	0
2017	Fall	15	18>	N	0
2017	Fall	15	18>	N	0
2017	Fall	15	18>	N	0
2017	Fall	15	18>	N	0
2017	Fall	15	18>	N	0
2017	Fall	15	18>	N	0
2017	Fall	15	18-24	F	3171
2017	Fall	15	18-24	F	3235
2017	Fall	15	24-30	F	3287
2017	Fall	15	24-30	M	3326
2017	Fall	15	30-36	F	3499
2017	Fall	15	30-36	F	3508
2017	Fall	15	36-42	F	3617
2017	Fall	15	42<	F	4101
2017	Fall	15	42<	M	3819
2017	Fall	19	18>	N	0
2017	Fall	19	18>	N	0
2017	Fall	19	18>	N	0
2017	Fall	19	18>	N	0
2017	Fall	19	18>	N	0
2017	Fall	19	18>	N	0
2017	Fall	19	18>	N	0
2017	Fall	19	18>	N	0
2017	Fall	19	18-24	F	3133
2017	Fall	19	18-24	F	3099
2017	Fall	19	18-24	M	3256
2017	Fall	19	24-30	F	3171
2017	Fall	19	24-30	F	3224
2017	Fall	19	30-36	M	3450
2017	Fall	19	36-42	F	3596
2017	Fall	20	18>	N	0
2017	Fall	20	18>	N	0
2017	Fall	20	18>	N	0
2017	Fall	20	18>	N	0
2017	Fall	20	18>	N	0
2017	Fall	20	18>	N	0
2017	Fall	20	18>	N	0
2017	Fall	20	18>	N	0
2017	Fall	20	18>	N	0
2017	Fall	20	18>	N	0
2017	Fall	20	18>	N	0
2017	Fall	20	18>	N	0
2017	Fall	20	18>	N	0
2017	Fall	20	18>	N	0
2017	Fall	20	18>	N	0
2017	Fall	20	18-24	F	3337
2017	Fall	20	18-24	F	3314
2017	Fall	20	18-24	M	3298
2017	Fall	20	24-30	F	3262
2017	Fall	20	30-36	F	3403
2017	Fall	20	36-42	M	3676
2017	Fall	20	36-42	M	3741
2017	Fall	20	42<	F	4023
2018	Winter	1	18>	N	0
2018	Winter	1	18>	N	0
2018	Winter	1	18>	N	0
2018	Winter	1	18>	N	0
2018	Winter	1	18>	N	0
2018	Winter	1	18>	N	0
2018	Winter	1	18>	N	0
2018	Winter	1	18-24	F	3134
2018	Winter	1	18-24	F	3161
2018	Winter	1	18-24	F	3129
2018	Winter	1	24-30	M	3375
2018	Winter	1	36-42	F	3709
2018	Winter	2	18>	N	0
2018	Winter	2	18>	N	0
2018	Winter	2	18>	N	0
2018	Winter	2	18>	N	0
2018	Winter	2	18>	N	0
2018	Winter	2	18>	N	0
2018	Winter	2	18>	N	0
2018	Winter	2	24-30	F	3087
2018	Winter	2	30-36	F	3131
2018	Winter	2	30-36	M	3211
2018	Winter	2	36-42	F	3674
2018	Winter	2	42<	M	3500
2018	Winter	3	18>	N	0
2018	Winter	3	18>	N	0
2018	Winter	3	18>	N	0
2018	Winter	3	18>	N	0
2018	Winter	3	18>	N	0
2018	Winter	3	18>	N	0
2018	Winter	3	18-24	F	3002
2018	Winter	3	18-24	F	2993
2018	Winter	3	24-30	F	3236
2018	Winter	3	24-30	M	3201
2018	Winter	3	36-42	F	3710
2018	Winter	3	42<	M	3547
2018	Winter	4	18>	N	0
2018	Winter	4	18>	N	0
2018	Winter	4	18>	N	0
2018	Winter	4	18>	N	0
2018	Winter	4	18>	N	0
2018	Winter	4	18-24	F	3238
2018	Winter	4	18-24	M	3283
2018	Winter	4	24-30	F	3378
2018	Winter	4	24-30	F	3412
2018	Winter	4	30-36	F	3645
2018	Winter	4	30-36	F	3692
2018	Winter	4	30-36	M	3808
2018	Winter	5	18>	N	0
2018	Winter	5	18>	N	0
2018	Winter	5	18>	N	0
2018	Winter	5	18>	N	0
2018	Winter	5	18>	N	0
2018	Winter	5	18>	N	0
2018	Winter	5	18-24	F	2973
2018	Winter	5	18-24	F	3010
2018	Winter	5	18-24	F	2981
2018	Winter	5	24-30	M	3137
[truncated: 2,193 more rows]
